# Supplementary material
Source: Springer Nature journal article supplement (https://www.springermedizin.de/resource/supplementary/13051_2011_229_MOESM2_ESM.pdf/9670216)
Supplement: MOESM2 [file 9670216]

**Table (1) : Types of pathology :**

| <b>Pathology</b>           | <b>Number of patients</b> |
|----------------------------|---------------------------|
| - Squamous cell carcinoma  | 17                        |
| - Microinvasive SCC        | 2                         |
| - Adenoid cystic carcinoma | 1                         |
| - peripheral ameloblastoma | 1                         |
| <b>Total</b>               | <b>21</b>                 |

**Table (2): cases with composite defects:**

| Patient | Age | Iry site                     | TNM stage      | Extent of composite resection                                                   | Type & result of neck dissection | Pathology                | Complications                                           | Postoperative radiotherapy |
|---------|-----|------------------------------|----------------|---------------------------------------------------------------------------------|----------------------------------|--------------------------|---------------------------------------------------------|----------------------------|
| Case 1  | 65  | Ant. Floor of mouth          | T2N0M0         | Floor of mouth + marginal mandibulectomy                                        | Bilateral SOHND -ve              | SCC                      | -----                                                   | yes                        |
| Case 2  | 82  | Lower alveolar margin        | T4N1M0         | Alveolar margin + Segmental mandibulectomy                                      | Ipsilateral MRND +ve 1/8         | SCC                      | -----                                                   | no                         |
| Case 3  | 47  | Buccal mucosa                | T3N0M0         | Buccal mucosa + upper alveolar margin + partial maxillectomy                    | Ipsilateral MRND -ve             | SCC                      | -----                                                   | yes                        |
| Case 4  | 47  | Rec. lower lip After Rth     | T4N0M0         | Submental flap for total lower lip+ free fibula for mandible and floor of mouth | Ipsilateral MRND -ve             | SCC                      | -----                                                   | no                         |
| Case 5  | 51  | Rec. buccal mucosa After Rth | T2N0M0         | Buccal mucosa + Segmental mandibulectomy+ reconstruction Plate + submental flap | Ipsilateral MRND -ve             | SCC                      | Partial exposure of plate ---covered by nasolabial flap | no                         |
| Case 6  | 62  | Tongue and floor of mouth    | T2N1M0         | Partial glossectomy + floor of mouth +upper marginal mandibulectomy             | Ipsilateral MRND -ve             | SCC                      | -----                                                   | no                         |
| Case 7  | 33  | Central segment mandible     | amelo-blastoma | Marginal mandibulectomy + floor of mouth                                        | -----                            | Peripheral ameloblastoma | -----                                                   | no                         |
| Case 8  | 84  | Alveolar margin              | T4N0M0         | Alveolar margin + Segmental mandibulectomy + reconstruction plate               | Ipsilateral MRND -ve             | SCC                      | Partial exposure of plate – debridement granulation     | no                         |
